# Supplementary material for: Synthesis and crystal structures of multifunctional tosylates as basis for star-shaped poly(2-ethyl-2-oxazoline)s
Source: publisher site journal article supplement (doi:10.3762/bjoc.6.96), 2010-09-09
Supplement: Additional file 1 [file 1860-5397-6-96-S1.pdf]

# Supporting Information

for

## Synthesis and crystal structures of multifunctional tosylates as basis for star-shaped poly(2-ethyl-2-oxazoline)s

Richard Hoogenboom<sup>\*1,2</sup>, Martin W. M. Fijten<sup>1</sup>, Guido Kickelbick<sup>3</sup> and Ulrich S. Schubert<sup>\*1,4</sup>

Address: <sup>1</sup>Laboratory of Macromolecular Chemistry and Nanoscience, Eindhoven University of Technology, Den Dolech 2, 5612AZ Eindhoven, The Netherlands; <sup>2</sup>Supramolecular Chemistry group, Department of Organic Chemistry, Ghent University, Krijgslaan 281 S4, 9000 Ghent, Belgium; <sup>3</sup>Inorganic Solid State Chemistry, Saarland University, Am Markt Zeile 3, 66125 Saarbrücken, Germany and <sup>4</sup>Laboratory of Organic and Macromolecular Chemistry, Friedrich-Schiller-University Jena, Humboldtstrasse 10, 07743 Jena, Germany

Email: Richard Hoogenboom - r.hoogenboom@tue.nl; Ulrich S. Schubert - ulrich.schubert@uni-jena.de

\* Corresponding authors

### Table of Contents

|                                                   |        |
|---------------------------------------------------|--------|
| Tables 1 and 2: Crystallographic data of DiTos-A  | S2–S3  |
| Tables 3 and 4: Crystallographic data of DiTos-B  | S3–S4  |
| Tables 5 and 6: Crystallographic data of TetraTos | S5–S7  |
| Tables 7 and 8: Crystallographic data of HexaTos  | S8–S13 |
|                                                   | S1     |

**Table 1:** Crystal data and structure refinement for DiTos-A.

|                                                                                                         |                                |                     |
|---------------------------------------------------------------------------------------------------------|--------------------------------|---------------------|
| Empirical formula                                                                                       | $C_{18}H_{22}O_7S_2$           |                     |
| Formula weight                                                                                          | 414.49                         |                     |
| Temperature                                                                                             | 296(2) K                       |                     |
| Wavelength                                                                                              | 0.71073 Å                      |                     |
| Crystal system, space group                                                                             | orthorhombic, Pbcn             |                     |
| Unit cell dimensions                                                                                    | a = 2239.7(2) pm               | $\alpha = 90^\circ$ |
|                                                                                                         | b = 569.05(5) pm               | $\beta = 90^\circ$  |
|                                                                                                         | c = 1551.74(13) pm             | $\gamma = 90^\circ$ |
| Volume [ $\times 10^6$ pm <sup>3</sup> ]                                                                | 1977.7(3)                      |                     |
| Z, Calculated density [g/cm <sup>3</sup> ]                                                              | 4, 1.392                       |                     |
| Absorption coefficient [mm <sup>-1</sup> ]                                                              | 0.306                          |                     |
| F(000)                                                                                                  | 872                            |                     |
| Crystal size [mm]                                                                                       | 0.78 × 0.24 × 0.23             |                     |
| Theta range for data collection [°]                                                                     | 2.63 to 28.30                  |                     |
| Limiting indices                                                                                        | $-29 \leq h \leq 29$           |                     |
|                                                                                                         | $-7 \leq k \leq 7$             |                     |
|                                                                                                         | $-20 \leq l \leq 20$           |                     |
| Reflections collected / unique                                                                          | 18775 / 2455 [R(int) = 0.0387] |                     |
| Completeness to $\theta = 28.30$ [%]                                                                    | 99.6                           |                     |
| Max. and min. Transmission                                                                              | 0.9330 and 0.7964              |                     |
| Refinement method                                                                                       | Full-matrix least-squares on   |                     |
| Data / restraints / parameters                                                                          | 2455 / 0 / 124                 |                     |
| Goodness-of-fit on $F^2$                                                                                | 1.160                          |                     |
| Final R indices [ $>2\sigma(I)$ ]                                                                       | R1 = 0.0695, wR2 = 0.1655      |                     |
| R indices (all data)                                                                                    | R1 = 0.0831, wR2 = 0.1758      |                     |
| Largest diff. peak and hole [ $e \cdot \text{Å}^{-3}$ ]                                                 | 0.506 and $-0.428$             |                     |
| Weight = $1 / [\sigma^2(F_o^2) + (0.0597)^2 + 2.56 P]$ where $P = (\text{Max}(F_o^2, 0) + 2 F_c^2) / 3$ |                                |                     |

**Table 2:** Selected bond lengths [pm] and angles [°] for DiTos-A.

|                |            |
|----------------|------------|
| S(1)-O(1)      | 141.9(3)   |
| S(1)-O(2)      | 142.2(3)   |
| S(1)-O(3)      | 157.7(2)   |
| S(1)-C(1)      | 175.4(3)   |
| C(1)-C(2)      | 138.3(4)   |
| C(1)-C(6)      | 138.7(4)   |
| C(2)-C(3)      | 138.0(4)   |
| O(3)-C(8)      | 145.1(4)   |
| C(3)-C(4)      | 138.1(4)   |
| O(4)-C(9)#1    | 140.8(4)   |
| O(4)-C(9)      | 140.8(4)   |
| C(4)-C(5)      | 138.9(4)   |
| C(4)-C(7)      | 151.4(4)   |
| C(5)-C(6)      | 138.0(4)   |
| O(1)-S(1)-O(2) | 119.72(18) |
| O(1)-S(1)-O(3) | 103.97(15) |
| O(2)-S(1)-O(3) | 109.29(14) |
| O(1)-S(1)-C(1) | 109.91(15) |

|                  |            |
|------------------|------------|
| O(2)-S(1)-C(1)   | 108.93(15) |
| O(3)-S(1)-C(1)   | 103.79(13) |
| C(2)-C(1)-C(6)   | 121.0(3)   |
| C(2)-C(1)-S(1)   | 119.6(2)   |
| C(6)-C(1)-S(1)   | 119.4(2)   |
| C(3)-C(2)-C(1)   | 119.0(3)   |
| C(8)-O(3)-S(1)   | 117.2(2)   |
| C(2)-C(3)-C(4)   | 121.3(3)   |
| C(9)#1-O(4)-C(9) | 112.2(4)   |
| C(3)-C(4)-C(5)   | 118.7(3)   |
| C(3)-C(4)-C(7)   | 120.8(3)   |
| C(5)-C(4)-C(7)   | 120.5(3)   |
| C(6)-C(5)-C(4)   | 121.1(3)   |
| C(5)-C(6)-C(1)   | 118.9(3)   |
| O(3)-C(8)-C(9)   | 107.5(3)   |
| O(4)-C(9)-C(8)   | 109.7(3)   |

Symmetry transformations used to generate equivalent atoms: #1  $-x+1, y, -z+1/2$ .

**Table 3:** Crystal data and structure refinement for DiTos-B.

|                                                                                                                                                 |                                                               |                            |
|-------------------------------------------------------------------------------------------------------------------------------------------------|---------------------------------------------------------------|----------------------------|
| Empirical formula                                                                                                                               | C <sub>18</sub> H <sub>22</sub> O <sub>6</sub> S <sub>2</sub> |                            |
| Formula weight                                                                                                                                  | 398.49                                                        |                            |
| Temperature                                                                                                                                     | 296(2) K                                                      |                            |
| Wavelength                                                                                                                                      | 0.71073 Å                                                     |                            |
| Crystal system, space group                                                                                                                     | triclinic, P-1                                                |                            |
| Unit cell dimensions                                                                                                                            | a = 520.47(16) pm                                             | $\alpha = 90.241(6)^\circ$ |
|                                                                                                                                                 | b = 603.05(18) pm                                             | $\beta = 93.091(6)^\circ$  |
|                                                                                                                                                 | c = 1524.9(5) pm                                              | $\gamma = 94.634(6)^\circ$ |
| Volume [x 10 <sup>6</sup> pm <sup>3</sup> ]                                                                                                     | 476.3(2)                                                      |                            |
| Z, Calculated density [g/cm <sup>3</sup> ]                                                                                                      | 2, 1.389                                                      |                            |
| Absorption coefficient [mm <sup>-1</sup> ]                                                                                                      | 0.311                                                         |                            |
| F(000)                                                                                                                                          | 210                                                           |                            |
| Crystal size [mm]                                                                                                                               | 0.80 × 0.33 × 0.06                                            |                            |
| Theta range for data collection [°]                                                                                                             | 2.68 to 28.25                                                 |                            |
| Limiting indices                                                                                                                                | -6 ≤ h ≤ 6                                                    |                            |
|                                                                                                                                                 | -8 ≤ k ≤ 7                                                    |                            |
|                                                                                                                                                 | -20 ≤ l ≤ 20                                                  |                            |
| Reflections collected / unique                                                                                                                  | 4752 / 2326 [R(int) = 0.1126]                                 |                            |
| Completeness to $\theta = 28.2$ [%]                                                                                                             | 99.4                                                          |                            |
| Max. and min. Transmission                                                                                                                      | 0.9816 and 0.7892                                             |                            |
| Refinement method                                                                                                                               | Full-matrix least-squares on F <sup>2</sup>                   |                            |
| Data / restraints / parameters                                                                                                                  | 2326 / 0 / 119                                                |                            |
| Goodness-of-fit on F <sup>2</sup>                                                                                                               | 1.076                                                         |                            |
| Final R indices [I > 2 $\sigma$ (I)]                                                                                                            | R1 = 0.0588, wR2 = 0.1509                                     |                            |
| R indices (all data)                                                                                                                            | R1 = 0.10760662, wR2 = 0.1575                                 |                            |
| Largest diff. peak and hole [e·Å <sup>-3</sup> ]                                                                                                | 0.584 and -0.280                                              |                            |
| Weight = 1 / [ $\sigma^2(F_o^2) + (0.0713 P)^2 + 0.05$ ] where P = (Max (F <sub>o</sub> <sup>2</sup> , 0) + 2 F <sub>c</sub> <sup>2</sup> ) / 3 |                                                               |                            |

**Table 4:** Selected bond lengths [pm] and angles [°] for DiTos-B.

---

|                  |            |
|------------------|------------|
| S(1)-O(3)        | 141.98(17) |
| S(1)-O(2)        | 142.39(18) |
| S(1)-O(1)        | 157.10(13) |
| S(1)-C(3)        | 175.63(19) |
| O(1)-C(2)        | 146.7(2)   |
| C(1)-C(2)        | 150.8(3)   |
| C(1)-C(1)#1      | 151.8(4)   |
| C(3)-C(8)        | 138.1(3)   |
| C(3)-C(4)        | 138.6(3)   |
| C(4)-C(5)        | 137.4(3)   |
| C(5)-C(6)        | 139.0(4)   |
| C(6)-C(7)        | 138.4(3)   |
| C(6)-C(9)        | 150.5(3)   |
| C(7)-C(8)        | 137.4(3)   |
| O(3)-S(1)-O(2)   | 120.00(11) |
| O(3)-S(1)-O(1)   | 103.90(10) |
| O(2)-S(1)-O(1)   | 109.00(9)  |
| O(3)-S(1)-C(3)   | 109.78(10) |
| O(2)-S(1)-C(3)   | 108.65(10) |
| O(1)-S(1)-C(3)   | 104.34(8)  |
| C(2)-O(1)-S(1)   | 117.45(12) |
| C(2)-C(1)-C(1)#1 | 113.8(2)   |
| O(1)-C(2)-C(1)   | 107.26(16) |
| C(8)-C(3)-C(4)   | 120.60(19) |
| C(8)-C(3)-S(1)   | 119.57(15) |
| C(4)-C(3)-S(1)   | 119.82(16) |
| C(5)-C(4)-C(3)   | 119.0(2)   |
| C(4)-C(5)-C(6)   | 121.4(2)   |
| C(7)-C(6)-C(5)   | 118.3(2)   |
| C(7)-C(6)-C(9)   | 121.0(2)   |
| C(5)-C(6)-C(9)   | 120.7(2)   |
| C(8)-C(7)-C(6)   | 121.3(2)   |
| C(7)-C(8)-C(3)   | 119.39(19) |

---

Symmetry transformations used to generate equivalent atoms: #1  $-x+1, -y+2, -z+1$

**Table 5:** Crystal data and structure refinement for TetraTos.

|                                                                                                                                                                                        |                                                                |                 |
|----------------------------------------------------------------------------------------------------------------------------------------------------------------------------------------|----------------------------------------------------------------|-----------------|
| Empirical formula                                                                                                                                                                      | C <sub>33</sub> H <sub>36</sub> O <sub>12</sub> S <sub>4</sub> |                 |
| Formula weight                                                                                                                                                                         | 752.86                                                         |                 |
| Temperature                                                                                                                                                                            | 296(2) K                                                       |                 |
| Wavelength                                                                                                                                                                             | 0.71073 Å                                                      |                 |
| Crystal system, space group                                                                                                                                                            | monoclinic, P2 <sub>1</sub> /c                                 |                 |
| Unit cell dimensions                                                                                                                                                                   | a = 1343.50(5) pm                                              | α = 90.241(6)°  |
|                                                                                                                                                                                        | b = 1826.45(7) pm                                              | β = 109.310(1)° |
|                                                                                                                                                                                        | c = 1551.87(6) pm                                              | γ = 94.634(6)°  |
| Volume [x 10 <sup>6</sup> pm <sup>3</sup> ]                                                                                                                                            | 3593.8(2)                                                      |                 |
| Z, Calculated density [g/cm <sup>3</sup> ]                                                                                                                                             | 4, 1.391                                                       |                 |
| Absorption coefficient [mm <sup>-1</sup> ]                                                                                                                                             | 0.325                                                          |                 |
| F(000)                                                                                                                                                                                 | 1576                                                           |                 |
| Crystal size [mm]                                                                                                                                                                      | 0.42 x 0.38 x 0.25                                             |                 |
| Theta range for data collection [°]                                                                                                                                                    | 2.63 to 30.05                                                  |                 |
| Limiting indices                                                                                                                                                                       | -18 ≤ h ≤ 17                                                   |                 |
|                                                                                                                                                                                        | -25 ≤ k ≤ 25                                                   |                 |
|                                                                                                                                                                                        | -21 ≤ l ≤ 19                                                   |                 |
| Reflections collected / unique                                                                                                                                                         | 27550 / 10437 [R(int) = 0.0187]                                |                 |
| Completeness to θ = 30.05 [%]                                                                                                                                                          | 99.3                                                           |                 |
| Max. and min. Transmission                                                                                                                                                             | 0.9232 and 0.8756                                              |                 |
| Refinement method                                                                                                                                                                      | Full-matrix least-squares on F <sup>2</sup>                    |                 |
| Data / restraints / parameters                                                                                                                                                         | 10437 / 0 / 442                                                |                 |
| Goodness-of-fit on F <sup>2</sup>                                                                                                                                                      | 1.012                                                          |                 |
| Final R indices [I > 2σ(I)]                                                                                                                                                            | R1 = 0.0486, wR2 = 0.1290                                      |                 |
| R indices (all data)                                                                                                                                                                   | R1 = 0.0706, wR2 = 0.1463                                      |                 |
| Largest diff. peak and hole [e·Å <sup>-3</sup> ]                                                                                                                                       | 0.364 and -0.278                                               |                 |
| Weight = 1 / [σ <sup>2</sup> (F <sub>o</sub> <sup>2</sup> ) + (0.0850 P) <sup>2</sup> + 0.25 P] where P = (Max (F <sub>o</sub> <sup>2</sup> , 0) + 2 F <sub>c</sub> <sup>2</sup> ) / 3 |                                                                |                 |

**Table 6:** Selected bond lengths [pm] and angles [°] for TetraTos.

|             |            |
|-------------|------------|
| C(1)-C(38)  | 152.3(2)   |
| C(1)-C(2)   | 152.5(2)   |
| C(1)-C(26)  | 153.1(2)   |
| C(1)-C(14)  | 153.3(2)   |
| C(2)-O(3)   | 145.30(19) |
| O(3)-S(4)   | 157.97(14) |
| S(4)-O(5)   | 142.07(14) |
| S(4)-O(6)   | 142.13(15) |
| S(4)-C(7)   | 174.58(19) |
| C(7)-C(12)  | 137.9(3)   |
| C(7)-C(8)   | 139.0(3)   |
| C(8)-C(9)   | 136.7(3)   |
| C(9)-C(10)  | 138.1(3)   |
| C(10)-C(11) | 138.2(3)   |
| C(10)-C(13) | 151.0(3)   |
| C(11)-C(12) | 137.0(3)   |
| C(14)-O(15) | 145.00(18) |
| O(15)-S(16) | 157.88(11) |

|                  |            |
|------------------|------------|
| S(16)-O(18)      | 142.14(13) |
| S(16)-O(17)      | 142.49(12) |
| S(16)-C(19)      | 174.73(16) |
| C(19)-C(20)      | 137.8(2)   |
| C(19)-C(24)      | 138.7(2)   |
| C(20)-C(21)      | 138.3(3)   |
| C(21)-C(22)      | 137.3(3)   |
| C(22)-C(23)      | 137.7(3)   |
| C(22)-C(25)      | 151.1(3)   |
| C(23)-C(24)      | 137.5(3)   |
| C(26)-O(27)      | 145.51(19) |
| O(27)-S(28)      | 157.99(13) |
| S(28)-O(29)      | 142.05(14) |
| S(28)-O(30)      | 142.25(14) |
| S(28)-C(31)      | 174.05(19) |
| C(31)-C(36)      | 138.3(2)   |
| C(31)-C(32)      | 138.5(2)   |
| C(32)-C(33)      | 136.8(3)   |
| C(33)-C(34)      | 137.9(3)   |
| C(34)-C(35)      | 138.1(3)   |
| C(34)-C(37)      | 151.1(3)   |
| C(35)-C(36)      | 136.6(3)   |
| C(38)-O(39)      | 145.21(17) |
| O(39)-S(40)      | 158.10(11) |
| S(40)-O(42)      | 141.92(14) |
| S(40)-O(41)      | 142.16(12) |
| S(40)-C(43)      | 175.28(17) |
| C(43)-C(48)      | 138.5(3)   |
| C(43)-C(44)      | 138.5(2)   |
| C(44)-C(45)      | 138.4(3)   |
| C(45)-C(46)      | 137.7(3)   |
| C(46)-C(47)      | 138.1(3)   |
| C(46)-C(49)      | 150.8(3)   |
| C(47)-C(48)      | 137.3(3)   |
| C(38)-C(1)-C(2)  | 111.33(13) |
| C(38)-C(1)-C(26) | 111.26(12) |
| C(2)-C(1)-C(26)  | 106.42(12) |
| C(38)-C(1)-C(14) | 105.84(12) |
| C(2)-C(1)-C(14)  | 110.99(12) |
| C(26)-C(1)-C(14) | 111.08(13) |
| O(3)-C(2)-C(1)   | 107.51(12) |
| C(2)-O(3)-S(4)   | 119.26(10) |
| O(5)-S(4)-O(6)   | 119.77(10) |
| O(5)-S(4)-O(3)   | 103.79(9)  |
| O(6)-S(4)-O(3)   | 108.14(8)  |
| O(5)-S(4)-C(7)   | 110.02(9)  |
| O(6)-S(4)-C(7)   | 109.01(9)  |
| O(3)-S(4)-C(7)   | 105.03(8)  |
| C(12)-C(7)-C(8)  | 120.16(18) |
| C(12)-C(7)-S(4)  | 120.10(15) |
| C(8)-C(7)-S(4)   | 119.73(15) |
| C(9)-C(8)-C(7)   | 119.43(19) |

|                   |            |
|-------------------|------------|
| C(8)-C(9)-C(10)   | 121.3(2)   |
| C(9)-C(10)-C(11)  | 118.3(2)   |
| C(9)-C(10)-C(13)  | 121.0(2)   |
| C(11)-C(10)-C(13) | 120.7(2)   |
| C(12)-C(11)-C(10) | 121.5(2)   |
| C(11)-C(12)-C(7)  | 119.28(19) |
| O(15)-C(14)-C(1)  | 106.71(12) |
| C(14)-O(15)-S(16) | 117.92(9)  |
| O(18)-S(16)-O(17) | 120.46(8)  |
| O(18)-S(16)-O(15) | 103.96(7)  |
| O(17)-S(16)-O(15) | 108.72(7)  |
| O(18)-S(16)-C(19) | 109.29(8)  |
| O(17)-S(16)-C(19) | 109.25(8)  |
| O(15)-S(16)-C(19) | 103.81(7)  |
| C(20)-C(19)-C(24) | 120.66(15) |
| C(20)-C(19)-S(16) | 120.89(12) |
| C(24)-C(19)-S(16) | 118.44(13) |
| C(19)-C(20)-C(21) | 118.59(16) |
| C(22)-C(21)-C(20) | 121.94(18) |
| C(21)-C(22)-C(23) | 118.22(18) |
| C(21)-C(22)-C(25) | 121.3(2)   |
| C(23)-C(22)-C(25) | 120.52(19) |
| C(24)-C(23)-C(22) | 121.59(16) |
| C(23)-C(24)-C(19) | 119.00(16) |
| O(27)-C(26)-C(1)  | 106.92(12) |
| C(26)-O(27)-S(28) | 118.59(10) |
| O(29)-S(28)-O(30) | 119.56(10) |
| O(29)-S(28)-O(27) | 108.75(8)  |
| O(30)-S(28)-O(27) | 103.55(8)  |
| O(29)-S(28)-C(31) | 109.20(9)  |
| O(30)-S(28)-C(31) | 109.78(9)  |
| O(27)-S(28)-C(31) | 104.92(8)  |
| C(36)-C(31)-C(32) | 120.08(18) |
| C(36)-C(31)-S(28) | 119.71(14) |
| C(32)-C(31)-S(28) | 120.16(14) |
| C(33)-C(32)-C(31) | 119.23(18) |
| C(32)-C(33)-C(34) | 121.65(19) |
| C(33)-C(34)-C(35) | 118.1(2)   |
| C(33)-C(34)-C(37) | 120.3(2)   |
| C(35)-C(34)-C(37) | 121.6(2)   |
| C(36)-C(35)-C(34) | 121.6(2)   |
| C(35)-C(36)-C(31) | 119.39(19) |
| O(39)-C(38)-C(1)  | 107.28(11) |
| C(38)-O(39)-S(40) | 117.41(9)  |
| O(42)-S(40)-O(41) | 120.34(9)  |
| O(42)-S(40)-O(39) | 109.00(7)  |
| O(41)-S(40)-O(39) | 103.77(7)  |
| O(42)-S(40)-C(43) | 109.03(8)  |
| O(41)-S(40)-C(43) | 109.45(8)  |
| O(39)-S(40)-C(43) | 103.96(7)  |
| C(48)-C(43)-C(44) | 120.51(18) |
| C(48)-C(43)-S(40) | 119.64(13) |

|                   |            |
|-------------------|------------|
| C(44)-C(43)-S(40) | 119.85(14) |
| C(45)-C(44)-C(43) | 118.58(19) |
| C(46)-C(45)-C(44) | 121.88(19) |
| C(45)-C(46)-C(47) | 118.1(2)   |
| C(45)-C(46)-C(49) | 121.1(2)   |
| C(47)-C(46)-C(49) | 120.7(2)   |
| C(48)-C(47)-C(46) | 121.6(2)   |
| C(47)-C(48)-C(43) | 119.27(18) |

**Table 7:** Crystal data and structure refinement for HexaTos.

|                                                                                                                                                                                        |                                                                |                                                       |
|----------------------------------------------------------------------------------------------------------------------------------------------------------------------------------------|----------------------------------------------------------------|-------------------------------------------------------|
| Empirical formula                                                                                                                                                                      | C <sub>52</sub> H <sub>58</sub> O <sub>19</sub> S <sub>6</sub> |                                                       |
| Formula weight                                                                                                                                                                         | 1179.38                                                        |                                                       |
| Temperature                                                                                                                                                                            | 296(2) K                                                       |                                                       |
| Wavelength                                                                                                                                                                             | 0.71073 Å                                                      |                                                       |
| Crystal system, space group                                                                                                                                                            | triclinic, P-1                                                 |                                                       |
| Unit cell dimensions                                                                                                                                                                   | a = 1236.49(6) pm<br>b = 1285.81(6) pm<br>c = 1977.73(9) pm    | α = 102.551(1)°<br>β = 102.194(1)°<br>γ = 101.605(1)° |
| Volume [x 10 <sup>6</sup> pm <sup>3</sup> ]                                                                                                                                            | 2897.7(2)                                                      |                                                       |
| Z, Calculated density [g/cm <sup>3</sup> ]                                                                                                                                             | 2, 1.368                                                       |                                                       |
| Absorption coefficient [mm <sup>-1</sup> ]                                                                                                                                             | 0.308                                                          |                                                       |
| F(000)                                                                                                                                                                                 | 1250                                                           |                                                       |
| Crystal size [mm]                                                                                                                                                                      | 0.73 × 0.46 × 0.24                                             |                                                       |
| Theta range for data collection [°]                                                                                                                                                    | 2.36 to 26.37                                                  |                                                       |
| Limiting indices                                                                                                                                                                       | -15 ≤ h ≤ 10<br>-16 ≤ k ≤ 15<br>-24 ≤ l ≤ 24                   |                                                       |
| Reflections collected / unique                                                                                                                                                         | 17323 / 11609 [R(int) = 0.0158]                                |                                                       |
| Completeness to θ = 26.37 [%]                                                                                                                                                          | 98.0                                                           |                                                       |
| Max. and min. Transmission                                                                                                                                                             | 0.9297 and 0.8063                                              |                                                       |
| Refinement method                                                                                                                                                                      | Full-matrix least-squares on F <sup>2</sup>                    |                                                       |
| Data / restraints / parameters                                                                                                                                                         | 11609 / 0 / 712                                                |                                                       |
| Goodness-of-fit on F <sup>2</sup>                                                                                                                                                      | 1.036                                                          |                                                       |
| Final R indices [I > 2σ(I)]                                                                                                                                                            | R1 = 0.0607, wR2 = 0.1736                                      |                                                       |
| R indices (all data)                                                                                                                                                                   | R1 = 0.0760, wR2 = 0.1912                                      |                                                       |
| Largest diff. peak and hole [e·Å <sup>3</sup> ]                                                                                                                                        | 1.605 and -0.553                                               |                                                       |
| Weight = 1 / [σ <sup>2</sup> (F <sub>o</sub> <sup>2</sup> ) + (0.1170 P) <sup>2</sup> + 1.06 P] where P = (Max (F <sub>o</sub> <sup>2</sup> , 0) + 2 F <sub>c</sub> <sup>2</sup> ) / 3 |                                                                |                                                       |

**Table 8:** Selected bond lengths [pm] and angles [°] for HexaTos.

|            |          |
|------------|----------|
| O(1)-C(2)  | 141.7(3) |
| O(1)-C(40) | 141.8(3) |
| C(2)-C(3)  | 153.0(3) |
| C(3)-C(28) | 151.1(4) |
| C(3)-C(16) | 152.8(3) |
| C(3)-C(4)  | 153.3(3) |
| C(4)-O(5)  | 140.9(4) |
| O(5)-S(6)  | 158.8(2) |



|             |            |
|-------------|------------|
| S(6)-O(7)   | 135.7(4)   |
| S(6)-O(8)   | 143.3(3)   |
| S(6)-C(9)   | 172.8(3)   |
| C(9)-C(14)  | 137.4(5)   |
| C(9)-C(10)  | 139.5(4)   |
| C(10)-C(11) | 138.7(4)   |
| C(11)-C(12) | 135.6(5)   |
| C(12)-C(13) | 137.1(5)   |
| C(12)-C(15) | 151.2(5)   |
| C(13)-C(14) | 136.7(5)   |
| C(16)-O(17) | 144.8(3)   |
| O(17)-S(18) | 158.35(17) |
| S(18)-O(19) | 142.2(2)   |
| S(18)-O(20) | 142.2(2)   |
| S(18)-C(21) | 174.8(3)   |
| C(21)-C(26) | 137.8(4)   |
| C(21)-C(22) | 138.7(4)   |
| C(22)-C(23) | 136.5(5)   |
| C(23)-C(24) | 138.4(6)   |
| C(24)-C(25) | 139.1(5)   |
| C(24)-C(27) | 150.3(5)   |
| C(25)-C(26) | 137.5(4)   |
| C(28)-O(29) | 144.9(3)   |
| O(29)-S(30) | 158.3(2)   |
| S(30)-O(31) | 141.8(3)   |
| S(30)-O(32) | 141.8(2)   |
| S(30)-C(33) | 175.0(3)   |
| C(33)-C(34) | 137.4(4)   |
| C(33)-C(38) | 138.1(4)   |
| C(34)-C(35) | 137.0(4)   |
| C(35)-C(36) | 138.4(5)   |
| C(36)-C(37) | 137.4(5)   |
| C(36)-C(39) | 150.8(4)   |
| C(37)-C(38) | 137.2(4)   |
| C(40)-C(41) | 153.0(3)   |
| C(41)-C(54) | 151.9(3)   |
| C(41)-C(66) | 152.2(4)   |
| C(41)-C(42) | 153.4(3)   |
| C(42)-O(43) | 144.6(3)   |
| O(43)-S(44) | 158.6(2)   |
| S(44)-O(45) | 141.8(3)   |
| S(44)-O(46) | 142.1(3)   |
| S(44)-C(47) | 175.3(3)   |
| C(47)-C(48) | 137.1(4)   |
| C(47)-C(52) | 138.4(4)   |
| C(48)-C(49) | 136.7(5)   |
| C(49)-C(50) | 137.7(6)   |
| C(50)-C(51) | 137.4(6)   |
| C(50)-C(53) | 150.9(6)   |
| C(51)-C(52) | 138.8(6)   |
| C(54)-O(55) | 145.4(3)   |
| O(55)-S(56) | 157.72(19) |

|                   |            |
|-------------------|------------|
| S(56)-O(57)       | 141.8(2)   |
| S(56)-O(58)       | 142.0(2)   |
| S(56)-C(59)       | 175.0(3)   |
| C(59)-C(64)       | 137.4(5)   |
| C(59)-C(60)       | 137.9(5)   |
| C(60)-C(61)       | 137.2(5)   |
| C(61)-C(62)       | 136.9(6)   |
| C(62)-C(63)       | 137.5(6)   |
| C(62)-C(65)       | 151.3(6)   |
| C(63)-C(64)       | 137.7(6)   |
| C(66)-O(67)       | 145.3(3)   |
| O(67)-S(68)       | 158.0(2)   |
| S(68)-O(69)       | 141.7(3)   |
| S(68)-O(70)       | 142.1(3)   |
| S(68)-C(71)       | 174.6(3)   |
| C(71)-C(76)       | 136.6(5)   |
| C(71)-C(72)       | 137.1(5)   |
| C(72)-C(73)       | 139.5(8)   |
| C(73)-C(74)       | 136.8(9)   |
| C(74)-C(75)       | 133.0(9)   |
| C(74)-C(77)       | 149.7(7)   |
| C(75)-C(76)       | 139.5(5)   |
| C(1S)-O(1S)#1     | 105(4)     |
| C(1S)-C(1S)#1     | 105(4)     |
| C(1S)-C(2S)       | 113(4)     |
| C(1S)-O(2S)#1     | 191(4)     |
| C(1S)-C(2S)#1     | 191(4)     |
| C(2S)-O(1S)#1     | 191(4)     |
| C(2S)-C(1S)#1     | 191(4)     |
| C(2)-O(1)-C(40)   | 111.14(18) |
| O(1)-C(2)-C(3)    | 109.38(19) |
| C(28)-C(3)-C(16)  | 112.4(2)   |
| C(28)-C(3)-C(2)   | 108.4(2)   |
| C(16)-C(3)-C(2)   | 106.87(19) |
| C(28)-C(3)-C(4)   | 112.0(2)   |
| C(16)-C(3)-C(4)   | 109.1(2)   |
| C(2)-C(3)-C(4)    | 107.8(2)   |
| O(5)-C(4)-C(3)    | 108.7(2)   |
| C(4)-O(5)-S(6)    | 119.1(2)   |
| O(7)-S(6)-O(8)    | 120.59(19) |
| O(7)-S(6)-O(5)    | 111.53(16) |
| O(8)-S(6)-O(5)    | 99.99(16)  |
| O(7)-S(6)-C(9)    | 110.34(16) |
| O(8)-S(6)-C(9)    | 108.96(16) |
| O(5)-S(6)-C(9)    | 103.81(13) |
| C(14)-C(9)-C(10)  | 120.3(3)   |
| C(14)-C(9)-S(6)   | 118.9(2)   |
| C(10)-C(9)-S(6)   | 120.7(2)   |
| C(11)-C(10)-C(9)  | 117.8(3)   |
| C(12)-C(11)-C(10) | 121.8(3)   |
| C(11)-C(12)-C(13) | 119.2(3)   |
| C(11)-C(12)-C(15) | 120.7(4)   |

|                   |            |
|-------------------|------------|
| C(13)-C(12)-C(15) | 120.1(4)   |
| C(14)-C(13)-C(12) | 121.0(3)   |
| C(13)-C(14)-C(9)  | 119.8(3)   |
| O(17)-C(16)-C(3)  | 109.31(19) |
| C(16)-O(17)-S(18) | 117.23(15) |
| O(19)-S(18)-O(20) | 119.66(14) |
| O(19)-S(18)-O(17) | 103.67(12) |
| O(20)-S(18)-O(17) | 108.89(12) |
| O(19)-S(18)-C(21) | 109.95(15) |
| O(20)-S(18)-C(21) | 109.57(14) |
| O(17)-S(18)-C(21) | 103.81(11) |
| C(26)-C(21)-C(22) | 121.0(3)   |
| C(26)-C(21)-S(18) | 120.3(2)   |
| C(22)-C(21)-S(18) | 118.7(2)   |
| C(23)-C(22)-C(21) | 118.8(3)   |
| C(22)-C(23)-C(24) | 121.9(3)   |
| C(23)-C(24)-C(25) | 118.1(3)   |
| C(23)-C(24)-C(27) | 121.3(4)   |
| C(25)-C(24)-C(27) | 120.5(4)   |
| C(26)-C(25)-C(24) | 121.0(3)   |
| C(25)-C(26)-C(21) | 119.2(3)   |
| O(29)-C(28)-C(3)  | 109.0(2)   |
| C(28)-O(29)-S(30) | 120.48(18) |
| O(31)-S(30)-O(32) | 120.87(17) |
| O(31)-S(30)-O(29) | 108.71(14) |
| O(32)-S(30)-O(29) | 103.63(14) |
| O(31)-S(30)-C(33) | 109.02(14) |
| O(32)-S(30)-C(33) | 109.72(13) |
| O(29)-S(30)-C(33) | 103.41(12) |
| C(34)-C(33)-C(38) | 120.3(3)   |
| C(34)-C(33)-S(30) | 119.5(2)   |
| C(38)-C(33)-S(30) | 120.2(2)   |
| C(35)-C(34)-C(33) | 119.5(3)   |
| C(34)-C(35)-C(36) | 121.4(3)   |
| C(37)-C(36)-C(35) | 118.1(3)   |
| C(37)-C(36)-C(39) | 120.9(3)   |
| C(35)-C(36)-C(39) | 121.0(3)   |
| C(38)-C(37)-C(36) | 121.6(3)   |
| C(37)-C(38)-C(33) | 119.2(3)   |
| O(1)-C(40)-C(41)  | 109.45(19) |
| C(54)-C(41)-C(66) | 111.6(2)   |
| C(54)-C(41)-C(40) | 105.25(19) |
| C(66)-C(41)-C(40) | 111.6(2)   |
| C(54)-C(41)-C(42) | 111.5(2)   |
| C(66)-C(41)-C(42) | 106.0(2)   |
| C(40)-C(41)-C(42) | 111.04(19) |
| O(43)-C(42)-C(41) | 107.5(2)   |
| C(42)-O(43)-S(44) | 118.18(17) |
| O(45)-S(44)-O(46) | 121.01(19) |
| O(45)-S(44)-O(43) | 103.74(15) |
| O(46)-S(44)-O(43) | 108.95(14) |
| O(45)-S(44)-C(47) | 109.22(16) |

|                       |            |
|-----------------------|------------|
| O(46)-S(44)-C(47)     | 109.24(16) |
| O(43)-S(44)-C(47)     | 103.12(12) |
| C(48)-C(47)-C(52)     | 119.9(3)   |
| C(48)-C(47)-S(44)     | 119.0(2)   |
| C(52)-C(47)-S(44)     | 121.0(2)   |
| C(49)-C(48)-C(47)     | 120.2(3)   |
| C(48)-C(49)-C(50)     | 121.9(3)   |
| C(51)-C(50)-C(49)     | 117.1(4)   |
| C(51)-C(50)-C(53)     | 121.9(4)   |
| C(49)-C(50)-C(53)     | 121.0(4)   |
| C(50)-C(51)-C(52)     | 122.6(3)   |
| C(47)-C(52)-C(51)     | 118.2(3)   |
| O(55)-C(54)-C(41)     | 108.3(2)   |
| C(54)-O(55)-S(56)     | 115.43(16) |
| O(57)-S(56)-O(58)     | 120.08(15) |
| O(57)-S(56)-O(55)     | 104.40(13) |
| O(58)-S(56)-O(55)     | 108.62(11) |
| O(57)-S(56)-C(59)     | 110.33(14) |
| O(58)-S(56)-C(59)     | 109.57(16) |
| O(55)-S(56)-C(59)     | 102.21(12) |
| C(64)-C(59)-C(60)     | 120.1(3)   |
| C(64)-C(59)-S(56)     | 121.6(3)   |
| C(60)-C(59)-S(56)     | 118.3(3)   |
| C(61)-C(60)-C(59)     | 119.5(4)   |
| C(62)-C(61)-C(60)     | 121.6(4)   |
| C(61)-C(62)-C(63)     | 117.8(4)   |
| C(61)-C(62)-C(65)     | 121.5(5)   |
| C(63)-C(62)-C(65)     | 120.7(5)   |
| C(62)-C(63)-C(64)     | 122.1(4)   |
| C(59)-C(64)-C(63)     | 118.8(4)   |
| O(67)-C(66)-C(41)     | 107.22(19) |
| C(66)-O(67)-S(68)     | 117.68(16) |
| O(69)-S(68)-O(70)     | 121.0(2)   |
| O(69)-S(68)-O(67)     | 108.88(15) |
| O(70)-S(68)-O(67)     | 103.69(14) |
| O(69)-S(68)-C(71)     | 108.2(2)   |
| O(70)-S(68)-C(71)     | 109.72(16) |
| O(67)-S(68)-C(71)     | 103.96(13) |
| C(76)-C(71)-C(72)     | 119.7(4)   |
| C(76)-C(71)-S(68)     | 119.3(3)   |
| C(72)-C(71)-S(68)     | 120.9(3)   |
| C(71)-C(72)-C(73)     | 118.6(5)   |
| C(74)-C(73)-C(72)     | 122.2(5)   |
| C(75)-C(74)-C(73)     | 117.6(5)   |
| C(75)-C(74)-C(77)     | 122.4(8)   |
| C(73)-C(74)-C(77)     | 120.0(8)   |
| C(74)-C(75)-C(76)     | 122.6(6)   |
| C(71)-C(76)-C(75)     | 119.3(4)   |
| O(1S)#1-C(1S)-C(1S)#1 | 0(3)       |
| O(1S)#1-C(1S)-C(2S)   | 122(5)     |
| C(1S)#1-C(1S)-C(2S)   | 122(5)     |
| O(1S)#1-C(1S)-O(2S)#1 | 30(2)      |

|                       |         |
|-----------------------|---------|
| C(1S)#1-C(1S)-O(2S)#1 | 30(2)   |
| C(2S)-C(1S)-O(2S)#1   | 152(3)  |
| O(1S)#1-C(1S)-C(2S)#1 | 30(2)   |
| C(1S)#1-C(1S)-C(2S)#1 | 30(2)   |
| C(2S)-C(1S)-C(2S)#1   | 152(3)  |
| O(2S)#1-C(1S)-C(2S)#1 | 0.0(10) |
| C(1S)-C(2S)-O(1S)#1   | 28(3)   |
| C(1S)-C(2S)-C(1S)#1   | 28(3)   |
| O(1S)#1-C(2S)-C(1S)#1 | 0.0(18) |

---

Symmetry transformations used to generate equivalent atoms: #1  $-x+1, -y+1, -z+2$
